# Supplementary material
Source: publisher figshare collection journal article supplement (https://asha.figshare.com/articles/dataset/_/14963814)
Supplement: Supplementary file 1 [file 1]

**Supplemental Table S1.** Descriptive data and statistical results for spoken answer accuracy according to word classes.

|                           | SLI group     | CATD group    | LATD group    | ANOVA               |           |            | Post-hoc comparisons |           |          |           |           |          |
|---------------------------|---------------|---------------|---------------|---------------------|-----------|------------|----------------------|-----------|----------|-----------|-----------|----------|
|                           |               |               |               |                     |           |            | SLI-CATD             |           | SLI-LATD |           | CATD-LATD |          |
|                           | <i>M (SD)</i> | <i>M (SD)</i> | <i>M (SD)</i> | <i>(df) F</i>       | <i>p</i>  | $\eta_p^2$ | <i>t</i>             | <i>p</i>  | <i>t</i> | <i>p</i>  | <i>t</i>  | <i>p</i> |
| NOUNS SUBTEST             |               |               |               |                     |           |            |                      |           |          |           |           |          |
| Spoken answers (A)        |               |               |               |                     |           |            |                      |           |          |           |           |          |
| Correct answer            | 12.93 (4.73)  | 17.80 (1.78)  | 9.30 (4.87)   |                     |           |            | -2.97                | .007      | 2.17     | .039      | -5.24     | .000     |
| Incorrect answer          | 4.57 (4.59)   | 2.20 (1.78)   | 9.06 (5.06)   |                     |           |            | 1.83                 | <i>ns</i> | -2.12    | .043      | 3.90      | .001     |
| Absent answer             | 2.00 (2.10)   | 0.00 (0.00)   | 1.80 (1.92)   |                     |           |            | 2.98                 | .007      | 0.18     | <i>ns</i> | 3.05      | .006     |
| A                         |               |               |               | (2, 84) 71.24       | .000      | .66        |                      |           |          |           |           |          |
| B (group)                 |               |               |               | (2, 42) 1.22        | <i>ns</i> | <i>ns</i>  |                      |           |          |           |           |          |
| A × B                     |               |               |               | (4, 84) 9.18        | .000      | .33        |                      |           |          |           |           |          |
| Correct answers (A)       |               |               |               |                     |           |            |                      |           |          |           |           |          |
| Fully correct             | 6.14 (4.32)   | 16.00 (2.98)  | 4.80 (4.75)   |                     |           |            | -6.27                | .000      | 0.80     | <i>ns</i> | -6.61     | .000     |
| Phonolog. simplif.        | 5.40 (3.04)   | 0.60 (1.27)   | 3.60 (2.23)   |                     |           |            | 4.70                 | .000      | 1.85     | <i>ns</i> | 3.85      | .001     |
| Onomatopoeia <sup>a</sup> | 0.33 (1.05)   | 0.00 (0.00)   | 0.14 (0.35)   |                     |           |            |                      |           |          |           |           |          |
| Synonym <sup>a</sup>      | 0.93 (0.80)   | 0.60 (0.70)   | 0.40 (0.83)   |                     |           |            |                      |           |          |           |           |          |
| A                         |               |               |               | (1, 42) 42.62       | .000      | .54        |                      |           |          |           |           |          |
| B (group)                 |               |               |               | (2, 42) 11.93       | .000      | .39        |                      |           |          |           |           |          |
| A × B                     |               |               |               | (2, 42) 25.89       | .000      | .58        |                      |           |          |           |           |          |
| Incorrect answers         |               |               |               |                     |           |            |                      |           |          |           |           |          |
| Semantically relat.       | 1.46 (1.41)   | 1.70 (1.06)   | 2.27 (1.98)   | Kruskal-Wallis test |           |            |                      |           |          |           |           |          |
| Semantic error            | 0.80 (0.68)   | 0.50 (0.85)   | 2.60 (2.35)   | $\chi^2(2) = 8.25$  | .016      |            |                      |           |          |           |           |          |
| Unintelligible            | 2.53 (4.48)   | 0.30 (0.48)   | 4.40 (5.63)   | $\chi^2(2) = 6.14$  | <i>ns</i> |            |                      |           |          |           |           |          |

|                           | SLI group     | CATD group    | LATD group    | ANOVA               |          |            | Post-hoc comparisons |           |          |           |           |           |
|---------------------------|---------------|---------------|---------------|---------------------|----------|------------|----------------------|-----------|----------|-----------|-----------|-----------|
|                           | <i>M (SD)</i> | <i>M (SD)</i> | <i>M (SD)</i> | <i>(df) F</i>       | <i>p</i> | $\eta_p^2$ | SLI-CATD             |           | SLI-LATD |           | CATD-LATD |           |
|                           |               |               |               |                     |          |            | <i>t</i>             | <i>p</i>  | <i>t</i> | <i>p</i>  | <i>t</i>  | <i>p</i>  |
| PREDICATES SUBTEST        |               |               |               |                     |          |            |                      |           |          |           |           |           |
| Spoken answers (A)        |               |               |               |                     |          |            |                      |           |          |           |           |           |
| Correct answer            | 12.27 (5.01)  | 17.60 (0.97)  | 8.37 (4.60)   |                     |          |            | -3.12                | .005      | 2.28     | .031      | -6.08     | .000      |
| Incorrect answer          | 6.10 (5.42)   | 2.30 (0.97)   | 10.07 (4.13)  |                     |          |            | 2.24                 | .035      | -2.08    | .046      | 5.65      | .000      |
| Absent answer             | 1.67 (1.58)   | 0.00 (0.00)   | 1.40 (2.38)   |                     |          |            | 1.86                 | <i>ns</i> | 0.63     | <i>ns</i> | 1.84      | <i>ns</i> |
| A                         |               |               |               | (2, 84)             | 73.34    | .000       |                      |           |          |           |           |           |
| B (group)                 |               |               |               | (2, 42)             | 0.09     | <i>ns</i>  |                      |           |          |           |           |           |
| A × B                     |               |               |               | (4, 84)             | 11.14    | .000       |                      |           |          |           |           |           |
| Correct answers (A)       |               |               |               |                     |          |            |                      |           |          |           |           |           |
| Fully correct             | 6.93 (6.09)   | 15.60 (2.12)  | 5.33 (4.22)   |                     |          |            | -4.31                | .000      | 0.84     | <i>ns</i> | -7.09     | .000      |
| Phonolog. simplif.        | 5.20 (4.26)   | 0.30 (0.68)   | 2.87 (2.75)   |                     |          |            | 3.58                 | .002      | 1.78     | <i>ns</i> | 2.88      | .009      |
| Onomatopoeia <sup>a</sup> | 0.07 (0.26)   | 0.10 (0.32)   | 0.13 (0.35)   |                     |          |            |                      |           |          |           |           |           |
| Synonym <sup>a</sup>      | 0.40 (0.74)   | 2.10 (1.20)   | 0.40 (0.83)   |                     |          |            |                      |           |          |           |           |           |
| A                         |               |               |               | (1, 42)             | 36.48    | .000       |                      |           |          |           |           |           |
| B (group)                 |               |               |               | (2, 42)             | 9.68     | .000       |                      |           |          |           |           |           |
| A × B                     |               |               |               | (2, 42)             | 14.67    | .000       |                      |           |          |           |           |           |
| Incorrect answers         |               |               |               |                     |          |            |                      |           |          |           |           |           |
| Semantically relat.       | 1.34 (1.83)   | 0.30 (0.48)   | 1.53 (1.25)   | Kruskal-Wallis test |          |            |                      |           |          |           |           |           |
| Semantic error            | 2.07 (1.58)   | 1.40 (1.17)   | 5.47 (2.53)   | $\chi^2(2) = 18.17$ | .000     |            |                      |           |          |           |           |           |
| Unintelligible            | 2.40 (4.52)   | 0.10 (0.78)   | 2.73 (2.58)   | $\chi^2(2) = 11.45$ | .001     |            |                      |           |          |           |           |           |

*Note.* <sup>a</sup> Onomatopoeias and synonyms were excluded from statistical analyses because they were infrequent in all groups.
