# Supplementary material
Source: publisher figshare collection journal article supplement (https://asha.figshare.com/articles/dataset/_/14963814)
Supplement: Supplementary file 2 [file 1]

**Supplemental Table S2.** Descriptive data and statistical results for modality of expression, types of gestures, and semantic relationship between gestures and speech, according to word classes.

|                                        | SLI group              | CATD group             | LATD group             | ANCOVA                 |           |            | Post-hoc comparisons |           |          |           |           |           |
|----------------------------------------|------------------------|------------------------|------------------------|------------------------|-----------|------------|----------------------|-----------|----------|-----------|-----------|-----------|
|                                        |                        |                        |                        |                        |           |            | SLI-CATD             |           | SLI-LATD |           | CATD-LATD |           |
|                                        | <i>M</i> ( <i>SD</i> ) | <i>M</i> ( <i>SD</i> ) | <i>M</i> ( <i>SD</i> ) | ( <i>df</i> ) <i>F</i> | <i>p</i>  | $\eta_p^2$ | <i>t</i>             | <i>p</i>  | <i>t</i> | <i>p</i>  | <i>t</i>  | <i>p</i>  |
| NOUNS SUBTEST                          |                        |                        |                        |                        |           |            |                      |           |          |           |           |           |
| Total number answers (C)               | 22.54 (3.87)           | 20.20 (0.42)           | 21.67 (3.46)           |                        |           |            |                      |           |          |           |           |           |
| Expression modality (A)                |                        |                        |                        |                        |           |            |                      |           |          |           |           |           |
| Unimodal spoken                        | 14.60 (5.08)           | 17.90 (2.38)           | 14.67 (6.22)           |                        |           |            | -1.91                | <i>ns</i> | 0.03     | <i>ns</i> | 2.04      | <i>ns</i> |
| Bimodal                                | 7.40 (6.77)            | 2.30 (2.26)            | 6.73 (6.56)            |                        |           |            | 2.29                 | .032      | 0.27     | <i>ns</i> | 2.14      | .046      |
| Unimodal gestural <sup>a</sup>         | .53 (.64)              | 0.00 (0.00)            | 0.26 (0.59)            |                        |           |            |                      |           |          |           |           |           |
| A × C                                  |                        |                        |                        | (1, 41) 5.24           | .028      | .13        |                      |           |          |           |           |           |
| B (group)                              |                        |                        |                        | (2, 41) 2.18           | <i>ns</i> | <i>ns</i>  |                      |           |          |           |           |           |
| A × B                                  |                        |                        |                        | (2, 41) 1.19           | <i>ns</i> | <i>ns</i>  |                      |           |          |           |           |           |
| Gesture types                          |                        |                        |                        |                        |           |            |                      |           |          |           |           |           |
| Deictic gestures                       | 6.27 (6.49)            | 2.20 (2.35)            | 5.73 (6.18)            | Kruskal-Wallis test    |           |            |                      |           |          |           |           |           |
| Representational gestures              | 1.60 (1.99)            | 0.10 (0.32)            | 1.27 (2.22)            | $\chi^2(2) = 3.13$     | <i>ns</i> |            |                      |           |          |           |           |           |
|                                        |                        |                        |                        | $\chi^2(2) = 6.57$     | .038      |            |                      |           |          |           |           |           |
| Gest-speech semantic rel. <sup>b</sup> |                        |                        |                        |                        |           |            |                      |           |          |           |           |           |
| Reinforcing g.corr-s.corr              | 1.40 (1.60)            | 0.10 (0.32)            | 0.40 (0.63)            |                        |           |            |                      |           |          |           |           |           |
| Reinforcing g.incorr-s.inc             | 0.27 (1.03)            | 0.00 (0.00)            | 0.13 (0.35)            |                        |           |            |                      |           |          |           |           |           |
| Adding g.corr-s.incorr                 | 0.27 (0.46)            | 0.00 (0.00)            | 0.47 (0.74)            |                        |           |            |                      |           |          |           |           |           |
| PREDICATES SUBTEST                     |                        |                        |                        |                        |           |            |                      |           |          |           |           |           |
| Total number answers (C)               | 24.07 (4.65)           | 21.10 (1.37)           | 26.06 (5.98)           |                        |           |            |                      |           |          |           |           |           |
| Expression modality (A)                |                        |                        |                        |                        |           |            |                      |           |          |           |           |           |
| Unimodal spoken                        | 13.87 (5.91)           | 20.00 (2.49)           | 16.60 (5.46)           |                        |           |            | -3.08                | .005      | -1.32    | <i>ns</i> | -1.84     | <i>ns</i> |
| Bimodal                                | 9.87 (7.31)            | 1.10 (1.60)            | 8.80 (6.28)            |                        |           |            | 9.68                 | .001      | 0.40     | <i>ns</i> | 3.77      | .001      |

|                                        | SLI group              | CATD group             | LATD group             | ANCOVA                 |          |            | Post-hoc comparisons |          |          |          |           |          |
|----------------------------------------|------------------------|------------------------|------------------------|------------------------|----------|------------|----------------------|----------|----------|----------|-----------|----------|
|                                        |                        |                        |                        |                        |          |            | SLI-CATD             |          | SLI-LATD |          | CATD-LATD |          |
|                                        | <i>M</i> ( <i>SD</i> ) | <i>M</i> ( <i>SD</i> ) | <i>M</i> ( <i>SD</i> ) | ( <i>df</i> ) <i>F</i> | <i>p</i> | $\eta_p^2$ | <i>t</i>             | <i>p</i> | <i>t</i> | <i>p</i> | <i>t</i>  | <i>p</i> |
| Unimodal gestural <sup>a</sup>         | 0.33 (0.62)            | 0.00 (0.00)            | 0.67 (0.90)            |                        |          |            |                      |          |          |          |           |          |
| A × C                                  |                        |                        |                        | (1, 41) 6.51           | .015     | .15        |                      |          |          |          |           |          |
| B (group)                              |                        |                        |                        | (2, 41) 3.16           | .055     | .15        |                      |          |          |          |           |          |
| A × B                                  |                        |                        |                        | (2, 41) 5.20           | .010     | .22        |                      |          |          |          |           |          |
| Gesture types                          |                        |                        |                        | Kruskal-Wallis test    |          |            |                      |          |          |          |           |          |
| Deictic gestures                       | 6.00 (5.81)            | 0.50 (0.97)            | 6.87 (5.29)            | $\chi^2(2) = 16.63$    | .000     |            |                      |          |          |          |           |          |
| Representational gestures              | 4.27 (3.64)            | 0.60 (0.97)            | 2.60 (2.90)            | $\chi^2(2) = 8.03$     | .018     |            |                      |          |          |          |           |          |
| Gest-speech semantic rel. <sup>b</sup> |                        |                        |                        |                        |          |            |                      |          |          |          |           |          |
| Reinforcing g.corr-s.corr              | 2.20 (1.94)            | 0.40 (0.97)            | 1.27 (1.44)            |                        |          |            |                      |          |          |          |           |          |
| Reinforcing g.incorr-s.inc             | 0.20 (0.56)            | 0.00 (0.00)            | 0.54 (0.99)            |                        |          |            |                      |          |          |          |           |          |
| Adding g.corr-s.incorr                 | 1.53 (2.39)            | 0.20 (0.42)            | 1.06 (1.28)            |                        |          |            |                      |          |          |          |           |          |

*Note.* C = covariate. <sup>a</sup> Unimodal gestural answers were excluded from statistical analyses because they were infrequent in all groups. <sup>b</sup> Given the low numbers of representational co-speech gestures produced in each subtest, the comparisons between groups and within group were limited to qualitative analyses.
